# Supplementary material for: Bile Acids: Major Regulator of the Gut Microbiome
Source: MDPI journal article supplement (doi:10.3390/microorganisms10091792), 2022-09-06
Supplement: s1 [file s1]

## Supplementary materials

Supplementary Table S1. Comparison between groups of relative quantity of microbiotas in colon and cecum.

| a. Colon                   |                  |                  |                  |                 |                   |                  |                     |
|----------------------------|------------------|------------------|------------------|-----------------|-------------------|------------------|---------------------|
| Relative quantity          | Groups           |                  |                  |                 |                   |                  | Significance value* |
|                            | vehicle          | UDCA             | CA               | CDCA            | DCA               | LCA              |                     |
| Universal T <sup>†</sup>   | 22.90±18.07<br>a | 22.94±9.36<br>a  | 23.75±11.35<br>a | 18.80±8.56<br>a | 60.25±57.84<br>a  | 42.78±48.04<br>a | NS<br>(P= .596)     |
| Bacteriotes T <sup>†</sup> | 16.35±8.71<br>a  | 49.13±63.58<br>a | 33.02±4.81<br>a  | 15.16±2.16<br>a | 13.28±3.76<br>a   | 40.65±21.56<br>a | NS<br>(P= .515)     |
| Firmicutes T <sup>†</sup>  | 5.78± 2.47<br>a  | 11.33±14.44<br>a | 6.32±0.88<br>a   | 4.42±0.84<br>a  | 4.66±1.04<br>a    | 25.42±35.34<br>a | NS<br>(P= .564)     |
| b. Cecum                   |                  |                  |                  |                 |                   |                  |                     |
| Relative quantity          | Groups           |                  |                  |                 |                   |                  | Significance value* |
|                            | vehicle          | UDCA             | CA               | CDCA            | DCA               | LCA              |                     |
| Universal T <sup>†</sup>   | 8.21±1.73<br>a   | 39.93±7.27<br>c  | 8.94±1.99<br>a   | 21.45±2.31<br>b | 15.47±0.16<br>a,b | 9.01±0.74<br>a   | P= .000             |
| Bacteriotes T <sup>†</sup> | 5.26±1.07<br>a   | 28.38±12.71<br>b | 4.80±1.53<br>a   | 10.58±1.47<br>a | 7.91±1.01<br>a    | 6.21±1.14<br>a   | P= .001             |
| Firmicutes T <sup>†</sup>  | 5.08±1.22<br>a   | 29.98±7.83<br>c  | 6.57±1.27<br>a,b | 15.99±4.13<br>b | 10.75±0.93<br>a,b | 5.80±0.31<br>a   | P= .000             |

\* Statistical significances were tested by oneway analysis of variances among group.

† The same letters indicate non-significant difference between groups based on Tukey's multiple comparison test.

Supplementary Table S2. Comparison of Firmicutes/Bacteroidetes ratio (F/B ratio) between colon and cecum.

| Relative quantity of microbiota |       | Groups      |             |             |             |             |             |
|---------------------------------|-------|-------------|-------------|-------------|-------------|-------------|-------------|
|                                 |       | vehicle     | UDCA        | CA          | CDCA        | DCA         | LCA         |
| Universal                       | Colon | 22.90±18.07 | 22.94±9.36  | 23.74±11.35 | 18.80±8.56  | 60.25±57.84 | 42.78±48.04 |
|                                 | Cecum | 8.21±1.73   | 39.93±7.27  | 8.94±1.99   | 21.45±2.31  | 15.47±0.16  | 9.00±0.74   |
| Bacteriotes                     | Colon | 16.35±8.71  | 49.13±63.58 | 33.02±4.81* | 15.16±2.16* | 13.28±3.76  | 40.65±21.56 |
|                                 | Cecum | 5.26±1.07   | 28.38±12.71 | 4.80±1.53*  | 10.58±1.47* | 7.90±1.01   | 6.21±1.14   |
| Firmicutes                      | Colon | 5.78±2.47   | 11.32±14.44 | 6.32±0.88   | 4.42±0.84*  | 4.66±1.04*  | 25.42±35.34 |
|                                 | Cecum | 5.08±1.22   | 29.98±7.83  | 6.57±1.27   | 15.99±4.13* | 10.75±0.93* | 5.80±0.31   |
| F/B ratio                       | Colon | 3.17±1.73   | 4.25±0.17*  | 5.37±1.53*  | 3.45±0.17*  | 2.86±0.55*  | 4.26±2.95   |
|                                 | Cecum | 1.11±0.49   | 0.91±0.19*  | 0.73±0.17*  | 0.68±0.19*  | 0.73±0.03*  | 1.08±0.23   |

\* The mean difference is significant at the 0.05 level (p< 0.05; t-test) between colon and cecum.
